# Supplementary material for: An assessment of landslide susceptibility in the Faifa area, Saudi Arabia, using remote sensing and GIS techniques
Source: Copernicus journal article supplement (doi:10.5194/nhess-14-1553-2014), 2014-06-23
Supplement: Supplementary file 1 [file nhess-14-1553-2014-supplement.pdf]

Supplement of Nat. Hazards Earth Syst. Sci., 14, 1553–1564, 2014  
<http://www.nat-hazards-earth-syst-sci.net/14/1553/2014/>  
doi:10.5194/nhess-14-1553-2014-supplement  
© Author(s) 2014. CC Attribution 3.0 License.

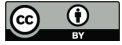

Natural Hazards  
and Earth System  
Sciences

Open Access

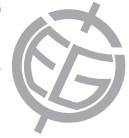

*Supplement of*

## **An assessment of landslide susceptibility in the Faifa area, Saudi Arabia, using remote sensing and GIS techniques**

**T. Alharbi et al.**

*Correspondence to:* M. Sultan (mohamed.sultan@wmich.edu)

Table S1. Identification of slope dip directions that are controlled by fracture planes dipping in the same direction.

| 1    | 2  | 3   | 4  | 5 | 6     | 7 | 8 | 9  | 10 | 11  |
|------|----|-----|----|---|-------|---|---|----|----|-----|
| 1.0  | 69 | 352 | 4  | 1 | 100.0 |   |   |    |    |     |
| 3.0  | 70 | 344 | 14 | 4 | 50.0  | 1 | 1 | 2  | 70 | 348 |
| 10.0 | 87 | 2   | 14 | 3 | 40.0  |   |   | 10 | 87 | 2   |
| 11.0 | 53 | 353 | 4  | 1 | 100.0 | 2 | 2 | 12 | 49 | 3   |
| 12.0 | 46 | 12  | 10 | 3 | 100.0 |   |   |    |    |     |
| 20.0 | 53 | 27  | 13 | 5 | 60.0  |   |   |    |    |     |
| 21.0 | 46 | 37  | 4  | 1 | 100.0 |   |   |    |    |     |
| 24.0 | 58 | 33  | 3  | 1 | 100.0 |   |   | 23 | 53 | 32  |
| 25.0 | 53 | 31  | 12 | 4 | 75.0  | 3 | 2 |    |    |     |
| 26.0 | 20 | 14  | 3  | 1 | 100.0 |   |   | 26 | 20 | 14  |
| 48.0 | 48 | 57  | 6  | 2 | 50.0  |   |   |    |    |     |
| 49.0 | 37 | 44  | 4  | 1 | 100.0 | 4 | 3 | 49 | 43 | 51  |
| 51.0 | 88 | 52  | 6  | 2 | 50.0  |   |   | 51 | 88 | 52  |
| 52.0 | 10 | 49  | 3  | 1 | 100.0 |   |   | 52 | 10 | 49  |
| 55.0 | 66 | 57  | 14 | 4 | 75.0  |   |   |    |    |     |
| 60.0 | 56 | 57  | 6  | 2 | 100.0 | 5 | 1 | 58 | 61 | 57  |
| 64.0 | 87 | 65  | 4  | 1 | 100.0 |   |   |    |    |     |
| 65.0 | 83 | 76  | 6  | 2 | 50.0  | 6 | 1 | 65 | 82 | 71  |
| 67.0 | 77 | 72  | 11 | 3 | 66.7  |   |   |    |    |     |
| 70.0 | 58 | 74  | 10 | 3 | 66.7  |   |   |    |    |     |
| 72.0 | 57 | 68  | 11 | 3 | 100.0 | 7 | 1 | 72 | 57 | 68  |
| 74.0 | 56 | 62  | 9  | 2 | 50.0  |   |   |    |    |     |
| 77.0 | 41 | 74  | 4  | 1 | 100.0 |   |   |    |    |     |
|      |    |     | 4  | 1 | 100.0 |   |   | 77 | 41 | 74  |
| 84.0 | 68 | 95  | 7  | 2 | 100.0 | 8 | 2 |    |    |     |

|       |    |     |    |   |       |    |   |     |    |     |
|-------|----|-----|----|---|-------|----|---|-----|----|-----|
| 85.0  | 53 | 89  | 10 | 3 | 100.0 |    |   | 85  | 61 | 92  |
| 95.0  | 54 | 96  | 6  | 2 | 66.7  |    |   |     |    |     |
| 101.0 | 58 | 96  | 5  | 1 | 100.0 |    |   |     |    |     |
| 105.0 | 60 | 105 | 3  | 1 | 100.0 |    |   | 100 | 57 | 99  |
| 97.0  | 32 | 97  | 4  | 1 | 100.0 | 9  | 2 |     |    |     |
| 99.0  | 44 | 83  | 4  | 1 | 100.0 |    |   |     |    |     |
| 100.0 | 43 | 109 | 15 | 5 | 100.0 |    |   |     |    |     |
| 107.0 | 38 | 110 | 3  | 1 | 100.0 |    |   | 101 | 39 | 100 |
| 115.0 | 34 | 130 | 6  | 2 | 50.0  | 10 | 2 | 115 | 10 | 2   |
| 114.0 | 60 | 120 | 11 | 3 | 100.0 |    |   | 114 | 60 | 120 |
| 135.0 | 44 | 144 | 16 | 5 | 85.7  |    |   |     |    |     |
| 145.0 | 53 | 139 | 13 | 5 | 80.0  |    |   |     |    |     |
| 146.0 | 46 | 150 | 3  | 1 | 100.0 |    |   |     |    |     |
|       |    |     | 3  | 1 | 100.0 | 11 | 3 | 142 | 48 | 144 |
| 138.0 | 24 | 135 | 3  | 1 | 100.0 |    |   |     |    |     |
| 140.0 | 30 | 140 | 7  | 2 | 50.0  |    |   | 139 | 27 | 138 |
| 136.0 | 86 | 134 | 3  | 1 | 100.0 |    |   | 136 | 86 | 134 |
| 150.0 | 43 | 156 | 3  | 1 | 100.0 |    |   |     |    |     |
| 157.0 | 38 | 161 | 5  | 1 | 100.0 |    |   |     |    |     |
| 160.0 | 46 | 150 | 4  | 1 | 100.0 |    |   |     |    |     |
| 165.0 | 43 | 155 | 8  | 3 | 66.7  |    |   |     |    |     |
| 181.0 | 27 | 166 | 3  | 1 | 100.0 |    |   | 163 | 39 | 158 |
| 158.0 | 68 | 158 | 3  | 1 | 100.0 |    |   |     |    |     |
| 163.0 | 63 | 151 | 10 | 3 | 66.7  |    |   |     |    |     |
| 184.0 | 49 | 199 | 8  | 2 | 50.0  | 12 | 3 |     |    |     |
| 176.0 | 67 | 167 | 7  | 2 | 100.0 |    |   | 170 | 62 | 169 |
| 170.0 | 70 | 168 | 6  | 2 | 100.0 |    |   |     |    |     |
| 180.0 | 78 | 175 | 4  | 1 | 100.0 |    |   |     |    |     |
| 188.0 | 81 | 195 | 4  | 1 | 100.0 |    |   |     |    |     |
| 190.0 | 72 | 196 | 2  | 1 | 100.0 |    |   |     |    |     |

|       |    |     |    |   |       |    |   |       |    |     |
|-------|----|-----|----|---|-------|----|---|-------|----|-----|
| 155.0 | 86 | 135 | 5  | 2 | 50.0  |    |   | 177   | 77 | 174 |
| 198.0 | 30 | 180 | 4  | 1 | 100.0 |    |   | 198   | 30 | 180 |
| 200.0 | 37 | 218 | 4  | 1 | 100.0 | 13 | 3 |       |    |     |
| 201.0 | 58 | 185 | 3  | 1 | 100.0 |    |   |       |    |     |
| 205.0 | 52 | 207 | 14 | 4 | 100.0 |    |   | 202   | 49 | 203 |
| 197.0 | 81 | 204 | 3  | 1 | 100.0 |    |   | 197   | 81 | 204 |
| 212.0 | 65 | 200 | 6  | 2 | 100.0 |    |   |       |    |     |
| 213.0 | 60 | 210 | 12 | 4 | 75.0  | 14 | 2 |       |    |     |
| 215.0 | 67 | 204 | 6  | 2 | 50.0  |    |   | 213   | 64 | 204 |
| 216.0 | 87 | 209 | 4  | 1 | 100.0 |    |   | 216   | 87 | 209 |
| 219.0 | 57 | 217 | 9  | 2 | 100.0 |    |   |       |    |     |
| 220.0 | 69 | 186 | 15 | 4 | 100.0 | 15 | 1 | 220   | 63 | 201 |
| 237.0 | 72 | 228 | 7  | 2 | 50.0  | 16 | 3 | 237   | 72 | 228 |
| 235.0 | 88 | 237 | 13 | 4 | 80.0  |    |   |       |    |     |
| 238.0 | 60 | 246 | 8  | 2 | 100.0 |    |   |       |    |     |
| 240.0 | 61 | 245 | 9  | 3 | 100.0 |    |   |       |    |     |
| 242.0 | 72 | 242 | 3  | 1 | 100.0 |    |   |       |    |     |
| 243.0 | 62 | 243 | 3  | 1 | 100.0 |    |   | 240   | 69 | 242 |
| 236.0 | 84 | 223 | 4  | 1 | 100.0 |    |   | 236   | 84 | 223 |
| 245.0 | 64 | 235 | 4  | 1 | 100.0 | 17 | 2 | 245.0 | 64 | 235 |
| 247.0 | 74 | 234 | 6  | 2 | 100.0 |    |   | 247.0 | 74 | 234 |
| 250.0 | 63 | 244 | 11 | 4 | 75.0  | 18 | 1 |       |    |     |
| 252.0 | 68 | 262 | 7  | 2 | 100.0 |    |   | 251   | 65 | 253 |
| 264.0 | 54 | 284 | 8  | 2 | 100.0 |    |   |       |    |     |
| 265.0 | 51 | 261 | 9  | 3 | 66.7  | 19 | 1 |       |    |     |
| 266.0 | 55 | 263 | 9  | 2 | 100.0 |    |   | 265   | 53 | 269 |
| 275.0 | 72 | 274 | 3  | 1 | 100.0 |    |   |       |    |     |
| 276.0 | 65 | 283 | 4  | 1 | 100.0 | 20 | 2 | 276   | 69 | 279 |
| 277.0 | 15 | 288 | 3  | 1 | 100.0 |    |   | 277.0 | 15 | 288 |

|       |    |     |    |   |       |    |   |       |    |     |
|-------|----|-----|----|---|-------|----|---|-------|----|-----|
| 286.0 | 47 | 306 | 5  | 1 | 100.0 | 21 | 1 | 287   | 46 | 307 |
| 287.0 | 44 | 307 | 3  | 1 | 100.0 |    |   |       |    |     |
| 311.0 | 55 | 307 | 8  | 2 | 50.0  |    |   |       |    |     |
| 312.0 | 45 | 312 | 6  | 2 | 100.0 |    |   |       |    |     |
| 313.0 | 52 | 311 | 3  | 1 | 100.0 |    |   |       |    |     |
| 315.0 | 56 | 325 | 6  | 2 | 100.0 |    |   |       |    |     |
| 319.0 | 40 | 307 | 3  | 1 | 100.0 |    |   |       |    |     |
| 322.0 | 48 | 330 | 6  | 2 | 50.0  | 22 | 3 | 315.3 | 49 | 315 |
| 318.0 | 78 | 318 | 6  | 2 | 100.0 |    |   | 318   | 78 | 318 |
| 320.0 | 10 | 313 | 13 | 4 | 50.0  |    |   | 320.0 | 10 | 313 |
| 328.0 | 38 | 323 | 3  | 1 | 100.0 |    |   | 328   | 38 | 323 |
| 325.0 | 53 | 333 | 23 | 7 | 57.1  | 23 | 3 |       |    |     |
| 330.0 | 40 | 332 | 9  | 2 | 50.0  |    |   | 328   | 47 | 333 |
| 331.0 | 81 | 333 | 3  | 1 | 100.0 |    |   | 331.0 | 81 | 333 |
| 338.0 | 53 | 353 | 7  | 2 | 50.0  | 24 | 1 | 338   | 53 | 353 |
| 345.0 | 72 | 348 | 10 | 3 | 66.7  |    |   | 345.0 | 72 | 348 |
| 346.0 | 75 | 257 | 3  | 1 | 100.0 | 25 | 3 | 346.0 | 75 | 257 |
| 348.0 | 26 | 347 | 11 | 3 | 66.7  |    |   | 348.0 | 26 | 347 |
| 355.0 | 30 | 348 | 16 | 5 | 60.0  |    |   |       |    |     |
| 356.0 | 28 | 349 | 8  | 2 | 100.0 |    |   |       |    |     |
| 358.0 | 30 | 355 | 7  | 2 | 100.0 | 26 | 2 | 356   | 29 | 351 |
| 360.0 | 58 | 13  | 9  | 3 | 66.7  |    |   | 360.0 | 58 | 373 |

- 1: Slope direction that was found to have one or more fracture planes dipping in a similar ( $\pm 20^\circ$ ) direction (column 1)
- 2: Dip angle for the fracture plane dipping in a direction similar to that of the slope
- 3: Dip direction for the fracture plane dipping in a direction similar to that of the slope
- 4: Total number of fracture planes that were measured at locations where one or more of the measured fracture planes dip in a direction similar to that of the slope
- 5: The number of locations where the fracture planes referred to in column 4 were measured.
- 6: The percentage of measured fracture planes that have dip directions similar to that of the slope direction
- 7: Group number, where each group refers to consecutive (three or more) slope directions that satisfied the condition of having one or more fracture planes dipping in a similar direction
- 8: Number of subgroups within each of the identified groups, where each subgroup includes fracture planes with similar dip directions
- 9: The average slope direction for each of the identified subgroups
- 10: The average fracture dip angle for each of the identified subgroups
- 11: The average fracture dip direction for each of the identified subgroups
